# Supplementary material
Source: Research Square preprint supplement (doi:10.21203/rs.3.rs-9827729/v1)
Supplement: Supplementary file 1 [file 859da184da4725192e0e038e.docx]

**Table S2.** Significant correlation coefficient between outcome measures, laboratory biochemical variables and patterns of environmental light exposure in individuals with ME/CFS and healthy controls

| **Measures** | **ME/CFS** | | |  | **Healthy controls**  ***P-*value 1**  ***P-*value 2** | | |
| --- | --- | --- | --- | --- | --- | --- | --- |
| **df** | **Light1** | **Light2** |  | **df** | **Light1** | **Light2** |
| **FIS-40** |  |  |  |  |  |  |  |
| Global score | 86 | 0.086 (0.423) | 0.005 (0.966) |  | 47 | -0.228 (0.116) | -0.218 (0.133) |
| Physical | 86 | 0.131 (0.225) | -0.005 (0.962) |  | 45 | -0.184 (0.216) | -0.225 (0.129) |
| Cognitive | 86 | 0.093 (0.391) | -0.019 (0.861) |  | 45 | -0.227 (0.125) | **-0.305 (0.037)** |
| Psychosocial | 86 | 0.016 (0.882) | 0.066 (0.540) |  | 45 | **-0.317 (0.030)** | -0.124 (0.407) |
| **PSQI** |  |  |  |  |  |  |  |
| Global score | 86 | -0.066 (0.543) | 0.074 (0.492) |  | 47 | 0.075 (0.607) | 0.162 (0.267) |
| Subjective sleep quality | 85 | -0.128 (0.239) | 0.030 (0.786) |  | 43 | -0.148 (0.333) | 0.153 (0.316) |
| Sleep latency | 85 | -0.037 (0.735) | 0.122 (0.260) |  | 43 | 0.175 (0.250) | 0.124 (0.419) |
| Sleep duration | 85 | -0.146 (0.178) | -0.013 (0.903) |  | 43 | 0.010 (0.948) | 0.138 (0.365) |
| Habitual sleep efficiency | 85 | -0.112 (0.300) | -0.129 (0.234) |  | 43 | 0.194 (0.201) | -0.010 (0.947) |
| Sleep disturbances | 85 | -0.029 (0.789) | 0.209 (0.052) |  | 43 | -0.023 (0.879) | -0.162 (0.288) |
| Sleeping medication | 85 | 0.069 (0.528) | 0.122 (0.260) |  | 43 | 0.076 (0.618) | 0.032 (0.834) |
| Daytime dysfunction | 85 | **0.231 (0.032)** | 0.020 (0.857) |  | 43 | 0.006 (0.971) | 0.150 (0.324) |
| **HADS** |  |  |  |  |  |  |  |
| Global score | 86 | 0.180 (0.094) | -0.078 (0.469) |  | 47 | 0.055 (0.707) | 0.063 (0.667) |
| Anxiety | 86 | **0.261 (0.014)** | -0.040 (0.709) |  | 45 | 0.106 (0.480) | 0.014 (0.928) |
| Depression | 86 | 0.052 (0.631) | -0.098 (0.365) |  | 45 | -0.051 (0.732) | 0.076 (0.610) |
| **COMPASS-31** |  |  |  |  |  |  |  |
| Global score | 86 | 0.048 (0.658) | **0.221 (0.039)** |  | 47 | -0.009 (0.951) | -0.166 (0.254) |
| Orthostatic intolerance | 86 | -0.069 (0.524) | 0.150 (0.163) |  | 45 | -0.174 (0.241) | -0.186 (0.210) |
| Vasomotor | 86 | 0.029 (0.785) | **0.220 (0.040)** |  | 45 | 0.228 (0.124) | 0.033 (0.826) |
| Secretomotor | 86 | 0.061 (0.570) | 0.147 (0.171) |  | 45 | 0.130 (0.384) | -0.056 (0.710) |
| Gastrointestinal | 86 | 0.064 (0.555) | **0.219 (0.041)** |  | 45 | 0.085 (0.568) | -0.053 (0.722) |
| Bladder | 86 | 0.158 (0.143) | 0.086 (0.426) |  | 45 | 0.021 (0.889) | -0.143 (0.338) |
| Pupillomotor | 86 | 0.155 (0.150) | 0.134 (0.212) |  | 45 | 0.089 (0.553) | -0.189 (0.203) |
| **SF-36** |  |  |  |  |  |  |  |
| Global score | 86 | -0.083 (0.440) | -0.124 (0.249) |  | 47 | -0.064 (0.661) | 0.059 (0.688) |
| Physical functioning | 85 | -0.006 (0.954) | -0.110 (0.308) |  | 45 | 0.116 (0.436) | -0.003 (0.983) |
| Physical role functioning | 85 | 0.033 (0.762) | 0.060 (0.581) |  | 45 | 0.038 (0.799) | 0.024 (0.871) |
| Bodily pain | 85 | -0.013 (0.905) | -0.126 (0.245) |  | 45 | -0.189 (0.204) | -0.006 (0.967) |
| General health perception | 85 | -0.126 (0.245) | -0.029 (0.792) |  | 45 | 0.011 (0.943) | 0.190 (0.201) |
| Vitality | 85 | -0.125 (0.247) | -0.171 (0.114) |  | 45 | 0.017 (0.908) | 0.005 (0.972) |
| Social role functioning | 85 | -0.030 (0.779) | -0.072 (0.510) |  | 45 | -0.037 (0.802) | 0.187 (0.208) |
| Emotional role functioning | 85 | -0.134 (0.214) | -0.111 (0.305) |  | 45 | -0.201 (0.176) | -0.017 (0.912) |
| Mental health | 85 | -0.072 (0.506) | 0.008 (0.941) |  | 45 | 0.017 (0.910) | 0.053 (0.722) |
| **Biochemical parameters** |  |  |  |  |  |  |  |
| ET-1 | 53 | 0.088 (0.525) | 0.209 (0.125) |  | 30 | -0.153 (0.403) | 0.150 (0.412) |
| TSP-1 | 53 | 0.051 (0.713) | 0.122 (0.376) |  | 30 | 0.245 (0.176) | 0.343 (0.055) |
| VCAM-1 | 53 | -0.065 (0.639) | **0.271 (0.046)** |  | 30 | 0.048 (0.793) | 0.307 (0.088) |
| ICAM-1 | 53 | -0.039 (0.776) | -0.124 (0.365) |  | 30 | 0.072 (0.697) | **0.373 (0.035)** |
| Total Chol | 51 | -0.078 (0.577) | 0.170 (0.222) |  | 30 | -0.033 (0.857) | -0.060 (0.746) |
| cHDL | 51 | 0.129 (0.358) | -0.082 (0.561) |  | 29 | -0.134 (0.472) | -0.236 (0.202) |
| cLDL | 51 | -0.136 (0.331) | 0.186 (0.182) |  | 29 | -0.088 (0.636) | -0.027 (0.887) |
| Triglycerides | 51 | -0.031 (0.824) | **0.361 (0.008)** |  | 30 | 0.233 (0.198) | 0.189 (0.300) |
| Total Chol/cHDL | 51 | -0.190 (0.173) | 0.245 (0.077) |  | 29 | 0.041 (0.825) | 0.250 (0.176) |
| cLDL/cHDL | 51 | -0.204 (0.143) | 0.220 (0.113) |  | 29 | 0.009 (0.962) | 0.207 (0.265) |
| Total Chol - cHDL | 51 | -0.135 (0.337) | 0.221 (0.111) |  | 29 | -0.046 (0.806) | 0.037 (0.845) |
| Triglycerides/cHDL | 51 | -0.053 (0.704) | **0.365 (0.007)** |  | 29 | 0.17 (0.361) | 0.296 (0.106) |
| Cortisol | 50 | 0.010 (0.945) | 0.220 (0.117) |  | 27 | 0.285 (0.134) | 0.168 (0.384) |
| Serotonin | 24 | -0.082 (0.692) | **-0.406 (0.039)** |  | 22 | 0.169 (0.430) | 0.180 (0.400) |

Data are displayed as r (*p*-value) adjusted for age, sex, BMI, season and amplitude of the activity rhythm. Bold values denote statistical significance at *p* ≤ 0.05 between cohorts. df, indicates degrees of freedom.
