# Supplementary material
Source: Research Square preprint supplement (doi:10.21203/rs.3.rs-9827729/v1)
Supplement: Supplementary file 2 [file f3e32775236d247bd1d2036e.docx]

**Table S1.** Partial correlation between light variables and outcomes measures and laboratory biochemical parameters in individuals with ME/CFS (left columns) and healthy controls (right columns)

| **Measures** | **ME/CFS** | | | | | | | | | | | **Healthy controls** | | | | | | | | | | |
| --- | --- | --- | --- | --- | --- | --- | --- | --- | --- | --- | --- | --- | --- | --- | --- | --- | --- | --- | --- | --- | --- | --- |
| **L_2_6** | **L_8_12** | **L_12_16** | **L_16_20** | **L_20_24** | **L_mean** | **L_A_cos** | **L_IV** | **L_IS** | **L_M10** | **L_L5** | **L_2_6** | **L_8_12** | **L_12_16** | **L_16_20** | **L_20_24** | **L_mean** | **L_A_cos** | **L_IV** | **L_IS** | **L_M10** | **L_L5** |
|  |  |  |  |  |  |  |  |  |  |  |  |  |  |  |  |  |  |  |  |  |  |  |
| **Total FIS-40** | 0.008 (0.943) | 0.009 (0.93) | 0.113 (0.297) | 0.056 (0.603) | 0.068 (0.530) | 0.027 (0.803) | 0.084 (0.435) | -0.089 (0.409) | 0.097 (0.367) | 0.083 (0.440) | -0.089 (0.410) | -0.115 (0.419) | -0.110 (0.438) | -0.077 (0.587) | -0.037 (0.794) | -0.156 (0.270) | -0.153 (0.284) | 0.022 (0.878) | 0.104 (0.467) | 0.015 (0.918) | -0.062 (0.665) | -0.177 (0.215) |
| Cognitive | -0.006 (0.956) | 0.048 (0.656) | 0.146 (0.176) | 0.062 (0.565) | 0.022 (0.838) | 0.038 (0.723) | 0.108 (0.317) | -0.042 (0.701) | 0.071 (0.514) | 0.126 (0.244) | -0.088 (0.416) | -0.195 (0.170) | -0.108 (0.450) | -0.117 (0.415) | -0.122 (0.394) | -0.236 (0.095) | -0.229 (0.109) | -0.001 (0.993) | 0.240 (0.093) | -0.027 (0.853) | -0.098 (0.501) | -0.263 (0.065) |
| Psychosocial | 0.077 (0.477) | -0.115 (0.285) | 0.026 (0.812) | 0.049 (0.651) | 0.112 (0.300) | -0.036 (0.741) | 0.057 (0.600) | -0.074 (0.495) | 0.045 (0.674) | 0.022 (0.838) | -0.183 (0.088) | -0.019 (0.893) | -0.097 (0.499) | -0.115 (0.422) | -0.113 (0.432) | -0.186 (0.191) | -0.160 (0.266) | -0.080 (0.583) | 0.141 (0.328) | -0.090 (0.535) | -0.089 (0.539) | -0.099 (0.492) |
| Physical | -0.011 (0.923) | 0.063 (0.561) | 0.147 (0.173) | 0.074 (0.494) | 0.081 (0.452) | 0.075 (0.488) | 0.099 (0.361) | -0.106 (0.324) | 0.163 (0.130) | 0.110 (0.310) | -0.027 (0.801) | -0.149 (0.296) | -0.079 (0.582) | -0.035 (0.808) | 0.003 (0.982) | -0.078 (0.585) | -0.102 (0.482) | 0.064 (0.661) | 0.015 (0.92) | 0.068 (0.639) | -0.030 (0.838) | -0.204 (0.156) |
|  |  |  |  |  |  |  |  |  |  |  |  |  |  |  |  |  |  |  |  |  |  |  |
| **Total HADS** | -0.083 (0.440) | 0.134 (0.212) | 0.192 (0.073) | 0.139 (0.197) | 0.017 (0.872) | 0.108 (0.315) | 0.151 (0.161) | -0.055 (0.610) | 0.183 (0.088) | 0.081 (0.454) | -0.049 (0.650) | 0.169 (0.232) | 0.096 (0.498) | 0.050 (0.725) | 0.268 (0.055) | 0.023 (0.869) | 0.141 (0.324) | 0.129 (0.365) | -0.074 (0.606) | 0.213 (0.134) | 0.064 (0.656) | 0.090 (0.53) |
| Anxiety | -0.068 (0.526) | **0.285 (0.007)** | **0.286 (0.007)** | 0.191 (0.075) | 0.065 (0.547) | **0.218 (0.041)** | 0.197 (0.066) | -0.113 (0.296) | **0.214 (0.045)** | 0.146 (0.176) | 0.014 (0.899) | 0.043 (0.769) | 0.192 (0.182) | 0.115 (0.425) | **0.348 (0.013)** | 0.178 (0.215) | 0.229 (0.113) | 0.232 (0.109) | -0.156 (0.284) | **0.283 (0.049)** | 0.150 (0.302) | -0.037 (0.799) |
| Depression | -0.081 (0.455) | -0.043 (0.692) | 0.052 (0.633) | 0.048 (0.655) | -0.041 (0.707) | -0.030 (0.780) | 0.064 (0.556) | 0.011 (0.919) | 0.101 (0.348) | -0.011 (0.922) | -0.098 (0.365) | 0.210 (0.142) | 0.108 (0.457) | 0.051 (0.727) | 0.180 (0.210) | -0.067 (0.642) | 0.117 (0.425) | 0.054 (0.713) | -0.022 (0.881) | 0.145 (0.319) | 0.046 (0.753) | 0.121 (0.406) |
|  |  |  |  |  |  |  |  |  |  |  |  |  |  |  |  |  |  |  |  |  |  |  |
| **Total COMPASS-31** | **0.222 (0.038)** | 0.023 (0.828) | 0.072 (0.503) | 0.150 (0.164) | 0.127 (0.237) | 0.130 (0.227) | 0.013 (0.903) | -0.126 (0.241) | 0.029 (0.786) | 0.057 (0.599) | 0.088 (0.416) | -0.131 (0.356) | -0.030 (0.835) | 0.107 (0.450) | 0.131 (0.356) | 0.098 (0.492) | 0.041 (0.775) | 0.203 (0.154) | -0.154 (0.281) | 0.210 (0.139) | 0.064 (0.656) | -0.170 (0.233) |
| Orthostatic intolerance | 0.178 (0.096) | -0.049 (0.652) | -0.048 (0.655) | 0.042 (0.699) | -0.019 (0.864) | 0.003 (0.976) | -0.092 (0.395) | -0.061 (0.573) | -0.084 (0.438) | 0.015 (0.889) | 0.098 (0.366) | -0.157 (0.271) | -0.158 (0.268) | -0.032 (0.826) | -0.049 (0.731) | 0.047 (0.743) | -0.108 (0.455) | 0.059 (0.684) | -0.038 (0.792) | 0.058 (0.689) | -0.061 (0.676) | -0.163 (0.257) |
| Vasomotor | **0.221 (0.038)** | -0.076 (0.481) | 0.043 (0.694) | 0.125 (0.245) | 0.169 (0.115) | 0.085 (0.430) | 0.055 (0.614) | -0.156 (0.147) | 0.002 (0.982) | 0.050 (0.646) | 0.034 (0.757) | -0.085 (0.552) | 0.241 (0.089) | 0.127 (0.375) | 0.256 (0.070) | 0.261 (0.065) | 0.253 (0.077) | 0.145 (0.316) | -0.167 (0.246) | 0.214 (0.136) | 0.158 (0.273) | -0.020 (0.892) |
| Secretomotor | 0.115 (0.285) | 0.057 (0.601) | 0.127 (0.237) | 0.041 (0.702) | 0.144 (0.181) | 0.133 (0.216) | -0.010 (0.923) | -0.095 (0.377) | 0.059 (0.586) | 0.020 (0.852) | 0.071 (0.513) | -0.041 (0.774) | 0.069 (0.629) | 0.216 (0.127) | 0.096 (0.502) | 0.071 (0.620) | 0.117 (0.418) | 0.166 (0.249) | -0.142 (0.327) | 0.171 (0.236) | 0.133 (0.356) | -0.066 (0.649) |
| Gastrointestinal | 0.184 (0.087) | 0.037 (0.735) | 0.083 (0.443) | **0.229 (0.032)** | 0.181 (0.092) | 0.181 (0.092) | 0.045 (0.679) | 0.013 (0.905) | 0.037 (0.735) | 0.005 (0.966) | 0.095 (0.377) | -0.046 (0.749) | 0.179 (0.209) | 0.139 (0.330) | 0.206 (0.147) | 0.060 (0.675) | 0.164 (0.255) | 0.200 (0.165) | -0.189 (0.188) | 0.182 (0.206) | 0.121 (0.401) | -0.128 (0.376) |
| Bladder | 0.079 (0.463) | 0.103 (0.338) | 0.133 (0.218) | 0.109 (0.311) | 0.140 (0.192) | 0.124 (0.250) | 0.130 (0.227) | **-0.257 (0.016)** | 0.145 (0.178) | 0.098 (0.366) | -0.029 (0.787) | -0.149 (0.298) | -0.017 (0.908) | 0.093 (0.516) | 0.084 (0.557) | 0.128 (0.372) | 0.018 (0.901) | 0.162 (0.260) | -0.109 (0.451) | 0.221 (0.124) | 0.078 (0.590) | -0.211 (0.142) |
| Pupillomotor | 0.182 (0.090) | 0.134 (0.213) | 0.160 (0.136) | 0.163 (0.128) | 0.106 (0.324) | 0.131 (0.222) | 0.164 (0.126) | -0.179 (0.096) | 0.154 (0.152) | 0.105 (0.332) | -0.083 (0.440) | -0.221 (0.102) | -0.025 (0.860) | 0.066 (0.646) | 0.114 (0.426) | 0.163 (0.253) | 0.027 (0.853) | 0.175 (0.223) | -0.028 (0.849) | 0.219 (0.127) | 0.056 (0.699) | -0.232 (0.104) |
|  |  |  |  |  |  |  |  |  |  |  |  |  |  |  |  |  |  |  |  |  |  |  |
| **Total SF-36** | -0.103 (0.339) | -0.096 (0.373) | -0.073 (0.496) | -0.146 (0.176) | -0.126 (0.242) | -0.103 (0.340) | -0.066 (0.540) | 0.109 (0.312) | -0.028 (0.796) | -0.063 (0.561) | 0.000 (0.997) | 0.021 (0.882) | 0.008 (0.957) | -0.180 (0.201) | **-0.280 (0.044)** | -0.083 (0.556) | -0.135 (0.343) | -0.248 (0.079) | 0.230 (0.104) | **-0.280 (0.046)** | -0.136 (0.342) | 0.084 (0.556) |
| Physical functioning | -0.102 (0.347) | 0.096 (0.374) | 0.030 (0.780) | -0.090 (0.409) | -0.150 (0.164) | -0.003 (0.976) | -0.035 (0.747) | 0.038 (0.730) | -0.046 (0.671) | -0.026 (0.810) | 0.063 (0.560) | 0.067 (0.639) | 0.154 (0.281) | 0.032 (0.821) | -0.038 (0.791) | -0.169 (0.236) | 0.053 (0.714) | -0.032 (0.827) | 0.043 (0.769) | -0.034 (0.813) | 0.065 (0.655) | 0.118 (0.415) |
| Physical role functioning | 0.011 (0.917) | **-0.227 (0.034)** | -0.019 (0.858) | 0.115 (0.291) | 0.138 (0.203) | 0.091 (0.403) | 0.013 (0.908) | -0.036 (0.744) | 0.151 (0.164) | 0.120 (0.268) | 0.160 (0.138) | -0.014 (0.922) | 0.073 (0.609) | -0.078 (0.585) | -0.025 (0.860) | 0.002 (0.988) | -0.003 (0.982) | -0.030 (0.837) | -0.009 (0.948) | -0.088 (0.543) | -0.035 (0.811) | 0.053 (0.713) |
| Bodily pain | -0.132 (0.224) | -0.022 (0.836) | 0.013 (0.908) | -0.048 (0.661) | -0.096 (0.375) | -0.017 (0.875) | -0.044 (0.683) | 0.142 (0.189) | 0.048 (0.658) | -0.002 (0.988) | 0.056 (0.604) | -0.026 (0.856) | -0.152 (0.289) | **-0.323 (0.021)** | **-0.333 (0.017)** | -0.157 (0.271) | **-0.290 (0.041)** | **-0.310 (0.029)** | **0.286 (0.044)** | **-0.329 (0.020)** | **-0.296 (0.037)** | 0.030 (0.835) |
| General health perception | -0.029 (0.793) | 0.012 (0.915) | -0.076 (0.482) | -0.163 (0.132) | -0.103 (0.344) | -0.083 (0.444) | -0.165 (0.127) | 0.119 (0.272) | -0.134 (0.217) | -0.113 (0.298) | 0.093 (0.394) | 0.130 (0.363) | -0.085 (0.552) | -0.150 (0.294) | -0.187 (0.189) | -0.029 (0.838) | -0.105 (0.470) | -0.233 (0.104) | 0.159 (0.269) | -0.243 (0.089) | -0.136 (0.347) | 0.230 (0.109) |
| Vitality | -0.121 (0.264) | 0.014 (0.901) | -0.086 (0.429) | **-0.213 (0.048)** | **-0.284 (0.008)** | -0.152 (0.161) | -0.149 (0.169) | 0.098 (0.365) | -0.127 (0.241) | -0.162 (0.134) | 0.002 (0.987) | -0.014 (0.920) | 0.059 (0.680) | -0.065 (0.649) | -0.181 (0.205) | -0.171 (0.231) | -0.083 (0.566) | -0.128 (0.377) | 0.185 (0.199) | -0.107 (0.458) | -0.006 (0.965) | 0.118 (0.414) |
| Social role functioning | -0.096 (0.378) | -0.010 (0.926) | -0.018 (0.869) | -0.082 (0.451) | -0.018 (0.865) | -0.025 (0.815) | -0.044 (0.689) | 0.100 (0.358) | -0.009 (0.936) | -0.030 (0.779) | -0.059 (0.587) | 0.131 (0.358) | 0.063 (0.660) | -0.102 (0.475) | -0.240 (0.090) | 0.022 (0.877) | -0.043 (0.764) | -0.237 (0.098) | 0.202 (0.160) | -0.224 (0.118) | -0.056 (0.699) | 0.155 (0.284) |
| Emotional role functioning | -0.064 (0.555) | **-0.214 (0.046)** | -0.130 (0.231) | -0.187 (0.082) | -0.125 (0.247) | -0.188 (0.082) | -0.069 (0.527) | 0.071 (0.515) | -0.067 (0.538) | -0.108 (0.318) | -0.051 (0.641) | -0.027 (0.849) | -0.126 (0.380) | -0.224 (0.114) | **-0.279 (0.048)** | -0.175 (0.218) | -0.230 (0.109) | -0.260 (0.068) | **0.314 (0.026)** | **-0.341 (0.015)** | -0.182 (0.207) | 0.039 (0.787) |
| Mental health | 0.019 (0.862) | -0.198 (0.066) | -0.127 (0.240) | -0.030 (0.784) | 0.026 (0.810) | -0.090 (0.408) | 0.008 (0.942) | -0.010 (0.928) | -0.042 (0.698) | -0.017 (0.877) | -0.076 (0.482) | -0.003 (0.985) | 0.014 (0.925) | 0.007 (0.959) | -0.254 (0.072) | -0.108 (0.450) | -0.049 (0.734) | -0.148 (0.304) | 0.149 (0.303) | -0.207 (0.150) | 0.009 (0.948) | 0.131 (0.366) |
|  |  |  |  |  |  |  |  |  |  |  |  |  |  |  |  |  |  |  |  |  |  |  |
| **Overall PSQI** | 0.092 (0.392) | -0.120 (0.264) | -0.054 (0.617) | -0.015 (0.892) | 0.019 (0.863) | -0.078 (0.471) | -0.031 (0.773) | -0.082 (0.445) | -0.091 (0.401) | -0.122 (0.257) | -0.064 (0.552) | 0.138 (0.330) | 0.142 (0.317) | 0.061 (0.669) | **0.276 (0.048)** | 0.170 (0.227) | 0.211 (0.137) | 0.072 (0.618) | -0.148 (0.300) | 0.190 (0.182) | 0.036 (0.801) | 0.110 (0.440) |
| Sleep quality | 0.089 (0.413) | -0.113 (0.297) | -0.046 (0.676) | -0.117 (0.282) | -0.062 (0.567) | -0.137 (0.205) | -0.060 (0.580) | 0.104 (0.337) | -0.124 (0.251) | -0.120 (0.270) | -0.173 (0.109) | 0.192 (0.186) | 0.010 (0.945) | -0.083 (0.570) | 0.006 (0.965) | -0.075 (0.606) | 0.014 (0.926) | -0.132 (0.372) | -0.013 (0.932) | -0.092 (0.534) | -0.112 (0.450) | 0.242 (0.097) |
| Sleep latency | 0.120 (0.267) | -0.135 (0.214) | -0.030 (0.785) | 0.022 (0.841) | 0.099 (0.362) | 0.010 (0.927) | -0.046 (0.675) | -0.019 (0.860) | 0.033 (0.761) | 0.060 (0.584) | 0.009 (0.937) | 0.152 (0.297) | 0.268 (0.062) | 0.133 (0.361) | **0.315 (0.027)** | 0.163 (0.263) | 0.290 (0.046) | 0.123 (0.407) | -0.095 (0.520) | **0.315 (0.029)** | 0.136 (0.357) | 0.131 (0.374) |
| Sleep duration | 0.019 (0.862) | -0.076 (0.482) | -0.158 (0.144) | -0.135 (0.213) | -0.102 (0.346) | -0.162 (0.134) | -0.104 (0.337) | 0.011 (0.919) | -0.183 (0.090) | **-0.217 (0.044)** | -0.040 (0.714) | 0.131 (0.368) | 0.166 (0.254) | 0.007 (0.964) | 0.151 (0.300) | 0.023 (0.877) | 0.145 (0.325) | 0.013 (0.929) | -0.090 (0.544) | 0.092 (0.534) | -0.002 (0.988) | 0.059 (0.691) |
| Sleep efficiency | -0.114 (0.293) | -0.194 (0.071) | -0.139 (0.198) | -0.113 (0.297) | -0.089 (0.414) | -0.191 (0.076) | -0.063 (0.565) | 0.085 (0.434) | -0.058 (0.594) | **-0.215 (0.046)** | -0.087 (0.422) | -0.074 (0.615) | 0.208 (0.151) | 0.119 (0.416) | **0.326 (0.022)** | 0.171 (0.241) | 0.215 (0.142) | 0.210 (0.152) | -0.199 (0.175) | **0.284 (0.050)** | 0.090 (0.544) | -0.063 (0.668) |
| Sleep disturbances | **0.215 (0.046)** | -0.050 (0.645) | 0.034 (0.758) | 0.014 (0.901) | 0.131 (0.226) | 0.029 (0.790) | 0.004 (0.968) | -0.120 (0.268) | -0.103 (0.345) | -0.036 (0.740) | -0.033 (0.764) | -0.056 (0.702) | -0.064 (0.661) | -0.029 (0.843) | 0.039 (0.789) | -0.210 (0.147) | -0.091 (0.536) | 0.062 (0.675) | 0.000 (0.999) | 0.033 (0.826) | -0.074 (0.619) | -0.039 (0.790) |
| Sleeping medication | 0.134 (0.215) | 0.092 (0.398) | 0.053 (0.623) | 0.109 (0.317) | 0.046 (0.674) | 0.065 (0.547) | 0.066 (0.545) | **-0.246 (0.022)** | -0.036 (0.743) | -0.047 (0.665) | 0.015 (0.888) | -0.025 (0.863) | 0.084 (0.567) | 0.043 (0.770) | 0.083 (0.569) | 0.146 (0.316) | 0.086 (0.561) | 0.063 (0.668) | -0.120 (0.415) | 0.017 (0.907) | 0.030 (0.840) | -0.079 (0.595) |
| Daytime dysfunction | -0.019 (0.863) | 0.121 (0.265) | 0.199 (0.065) | **0.247 (0.021)** | 0.156 (0.149) | 0.209 (0.052) | 0.194 (0.072) | -0.091 (0.404) | **0.263 (0.014)** | **0.251 (0.019)** | 0.035 (0.746) | 0.066 (0.651) | -0.043 (0.769) | 0.029 (0.844) | 0.182 (0.211) | **0.301 (0.036)** | 0.113 (0.445) | 0.032 (0.832) | -0.031 (0.837) | 0.114 (0.439) | 0.035 (0.816) | 0.009 (0.949) |
|  |  |  |  |  |  |  |  |  |  |  |  |  |  |  |  |  |  |  |  |  |  |  |
| **Biochemical parameters** |  |  |  |  |  |  |  |  |  |  |  |  |  |  |  |  |  |  |  |  |  |  |
| ET-1 | **0.269 (0.047)** | **0.318 (0.018)** | -0.015 (0.913) | 0.155 (0.259) | 0.050 (0.719) | 0.042 (0.761) | 0.117 (0.397) | 0.042 (0.763) | -0.249 (0.067) | 0.156 (0.257) | 0.116 (0.400) | 0.075 (0.670) | -0.325 (0.057) | -0.206 (0.235) | -0.094 (0.593) | 0.191 (0.272) | -0.160 (0.366) | -0.164 (0.353) | 0.006 (0.972) | -0.149 (0.400) | -0.166 (0.348) | 0.156 (0.377) |
| TSP-1 | 0.086 (0.533) | 0.252 (0.064) | -0.203 (0.137) | -0.006 (0.964) | 0.117 (0.397) | -0.002 (0.991) | -0.016 (0.908) | 0.083 (0.546) | **-0.275 (0.042)** | 0.144 (0.296) | 0.212 (0.119) | 0.193 (0.266) | 0.100 (0.568) | 0.147 (0.400) | 0.301 (0.079) | **0.501 (0.002)** | 0.328 (0.058) | 0.113 (0.523) | **-0.392 (0.022)** | 0.242 (0.169) | 0.130 (0.465) | 0.175 (0.322) |
| VCAM-1 | 0.188 (0.170) | 0.250 (0.065) | -0.094 (0.496) | -0.142 (0.299) | 0.122 (0.375) | 0.104 (0.450) | 0.059 (0.671) | -0.067 (0.629) | -0.070 (0.611) | -0.098 (0.475) | -0.089 (0.520) | 0.233 (0.177) | 0.133 (0.447) | 0.137 (0.433) | 0.243 (0.159) | 0.378 (0.025) | 0.310 (0.074) | 0.020 (0.911) | -0.269 (0.124) | 0.109 (0.538) | 0.058 (0.743) | 0.128 (0.470) |
| ICAM-1 | 0.103 (0.456) | 0.008 (0.953) | 0.129 (0.347) | -0.078 (0.573) | -0.122 (0.376) | -0.231 (0.090) | -0.099 (0.470) | -0.041 (0.767) | 0.056 (0.682) | 0.056 (0.686) | 0.027 (0.847) | 0.422 (0.012) | 0.246 (0.155) | 0.100 (0.567) | 0.199 (0.251) | 0.219 (0.207) | 0.329 (0.058) | -0.077 (0.664) | -0.104 (0.560) | 0.187 (0.289) | 0.086 (0.627) | 0.405 (0.018) |
| Total Chol | 0.130 (0.354) | 0.265 (0.055) | -0.244 (0.078) | 0.011 (0.936) | -0.014 (0.921) | 0.043 (0.762) | -0.028 (0.842) | -0.010 (0.943) | 0.142 (0.309) | 0.046 (0.745) | -0.022 (0.874) | 0.080 (0.647) | -0.149 (0.392) | 0.098 (0.576) | 0.069 (0.696) | -0.010 (0.954) | -0.016 (0.927) | 0.107 (0.547) | 0.005 (0.978) | 0.145 (0.414) | 0.093 (0.602) | 0.044 (0.805) |
| cHDL | 0.032 (0.819) | -0.071 (0.613) | 0.101 (0.471) | 0.078 (0.581) | 0.142 (0.310) | 0.024 (0.862) | 0.094 (0.501) | 0.143 (0.308) | 0.011 (0.937) | 0.176 (0.208) | 0.050 (0.724) | -0.090 (0.612) | -0.090 (0.615) | -0.129 (0.466) | -0.089 (0.616) | -0.297 (0.089) | -0.219 (0.220) | 0.046 (0.801) | 0.128 (0.476) | 0.001 (0.994) | -0.102 (0.571) | -0.185 (0.302) |
| cLDL | 0.106 (0.451) | **0.299 (0.030)** | **-0.274 (0.047)** | -0.028 (0.844) | -0.067 (0.633) | -0.008 (0.954) | -0.073 (0.602) | -0.064 (0.649) | 0.154 (0.272) | -0.032 (0.820) | -0.026 (0.852) | 0.075 (0.672) | -0.194 (0.270) | 0.058 (0.746) | 0.038 (0.830) | 0.044 (0.807) | -0.034 (0.851) | 0.031 (0.863) | 0.048 (0.790) | 0.091 (0.615) | 0.055 (0.760) | 0.063 (0.728) |
| Triglycerides | 0.103 (0.461) | **0.354 (0.009)** | **-0.334 (0.014)** | -0.058 (0.679) | 0.109 (0.437) | **0.289 (0.036)** | 0.049 (0.728) | 0.036 (0.800) | -0.099 (0.478) | 0.040 (0.775) | -0.101 (0.471) | 0.101 (0.566) | 0.237 (0.171) | 0.264 (0.126) | 0.197 (0.257) | 0.319 (0.062) | 0.339 (0.050) | 0.101 (0.568) | -0.286 (0.102) | 0.155 (0.382) | 0.205 (0.244) | 0.165 (0.351) |
| Total Chol/cHDL | 0.072 (0.606) | **0.307 (0.025)** | -0.330 (0.016) | -0.073 (0.604) | -0.145 (0.302) | 0.056 (0.692) | -0.110 (0.433) | -0.149 (0.286) | 0.121 (0.390) | -0.100 (0.474) | -0.081 (0.563) | 0.219 (0.214) | 0.016 (0.929) | 0.100 (0.572) | 0.098 (0.581) | 0.231 (0.189) | 0.177 (0.325) | -0.054 (0.766) | -0.082 (0.648) | 0.014 (0.937) | 0.084 (0.644) | 0.272 (0.126) |
| cLDL/cHDL | 0.051 (0.719) | **0.303 (0.027)** | **-0.325 (0.017)** | -0.089 (0.526) | -0.154 (0.272) | 0.005 (0.972) | -0.131 (0.351) | -0.154 (0.271) | 0.127 (0.365) | -0.121 (0.386) | -0.072 (0.606) | 0.194 (0.273) | -0.034 (0.850) | 0.073 (0.681) | 0.068 (0.704) | 0.196 (0.268) | 0.122 (0.498) | -0.058 (0.751) | -0.056 (0.757) | 0.006 (0.971) | 0.060 (0.740) | 0.239 (0.180) |
| Total Chol-cHDL | 0.134 (0.340) | **0.323 (0.018)** | **-0.309 (0.025)** | **-0.015 (0.914)** | -0.067 (0.632) | 0.039 (0.779) | -0.065 (0.644) | -0.064 (0.650) | 0.154 (0.272) | -0.015 (0.917) | -0.042 (0.765) | 0.114 (0.519) | -0.135 (0.446) | 0.104 (0.559) | 0.082 (0.646) | 0.098 (0.583) | 0.042 (0.814) | 0.039 (0.828) | 0.007 (0.971) | 0.102 (0.572) | 0.093 (0.608) | 0.117 (0.515) |
| Triglycerides/cHDL | 0.092 (0.512) | **0.347 (0.011)** | **-0.316 (0.021)** | -0.068 (0.630) | 0.074 (0.598) | **0.288 (0.037)** | **0.041 (0.77)** | -0.003 (0.981) | -0.073 (0.604) | 0.014 (0.922) | -0.104 (0.460) | 0.173 (0.329) | 0.223 (0.204) | 0.163 (0.358) | 0.166 (0.349) | **0.344 (0.047)** | 0.330 (0.060) | -0.026 (0.885) | -0.210 (0.241) | 0.043 (0.814) | 0.130 (0.471) | 0.239 (0.180) |
| Cortisol | **0.325 (0.019)** | **0.277 (0.046)** | **-0.035 (0.803)** | 0.077 (0.586) | 0.169 (0.231) | 0.090 (0.524) | 0.116 (0.414) | 0.020 (0.889) | 0.185 (0.190) | 0.083 (0.560) | 0.055 (0.696) | 0.048 (0.793) | 0.242 (0.182) | 0.341 (0.056) | 0.338 (0.058) | 0.282 (0.117) | **0.380 (0.035)** | **0.243 (0.187)** | -0.265 (0.150) | 0.230 (0.214) | 0.344 (0.058) | 0.037 (0.843) |
| Serotonin | -0.259 (0.201) | -0.377 (0.058) | -0.084 (0.682) | -0.021 (0.921) | -0.215 (0.292) | -0.278 (0.169) | -0.239 (0.239) | -0.069 (0.736) | 0.058 (0.780) | -0.051 (0.806) | -0.177 (0.386) | 0.120 (0.561) | 0.125 (0.541) | 0.104 (0.613) | 0.041 (0.843) | 0.136 (0.508) | 0.140 (0.495) | 0.025 (0.902) | 0.064 (0.758) | 0.081 (0.692) | 0.158 (0.442) | 0.094 (0.648) |

Data are displayed as r (*p*-value) adjusted for age, sex, BMI, season and amplitude of the activity rhythm. Bold values denote statistical significance at *p* ≤ 0.05 between cohorts. L_2-6: mean light activity intensity from 02:00 to 06:00 hours; L_8-12: from 08:00 to 12:00 hours; L_12-16: from 12:00 to 16:00 hours; L_16-20: from 16:00 to 20:00 hours; L_20-24: from 20:00 to 24:00 hours; L_mean: mean light in 24 hours; L_A-cos: amplitude of the 24 hour light rhythm; L_IV: intradaily variability of the 24 hour light rhythm; L_IS: interdaily stability of the 24 hour light rhythm; L_M10: mean value of the 10 consecutive hours of highest light exposure; L_L5: 5 mean value of the 5 consecutive hours of lowest light exposure.
